# Supplementary material for: A 3D hierarchical magnetic Fe@Pt/Ti(OH)4 nanoarchitecture for sinter-resistant catalyst
Source: Royal Society of Chemistry journal article supplement (doi:10.1039/c5ra13887f), 2015-01-01
Supplement: c5ra13887f1.pdf [file c5ra13887f1.pdf]

## A 3D Hierarchical Magnetic Fe@Pt/Ti(OH)<sub>4</sub> Nanoarchitecture for Sinter-Resistant Catalyst

Chao Zhang, Yuming Zhou\*, Yiwei Zhang\*, Zewu Zhang, Yuanmei Xu, Qianli

Wang

School of Chemistry and Chemical Engineering, Southeast University, Jiangsu  
Optoelectronic Functional Materials and Engineering Laboratory, Nanjing 211189,  
China

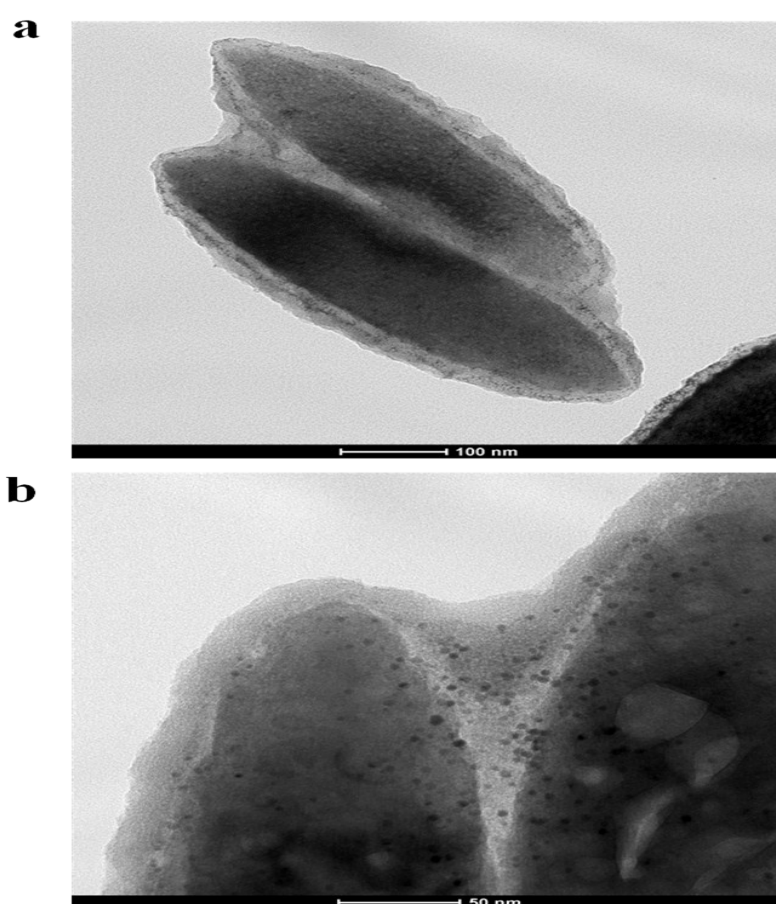

Fig. S1 TEM images of (a)  $\alpha$ -Fe<sub>2</sub>O<sub>3</sub>@C/Pt/TiO<sub>2</sub>, (b) calcined  $\alpha$ -

Corresponding author: Yuming Zhou

E-mail: fchem@163.com;

Tel: +86 25 52090617;

Fax: +86 25 52090617.

$\text{Fe}_2\text{O}_3@C/\text{Pt}/\text{TiO}_2/\text{mSiO}_2$  at 500 °C in air for 4h.

The loaded Pt NPs could be clearly observed between carbon and  $\text{TiO}_2$  layer, demonstrating the synthesis of  $\alpha\text{-Fe}_2\text{O}_3@C/\text{Pt}/\text{TiO}_2$  sample.

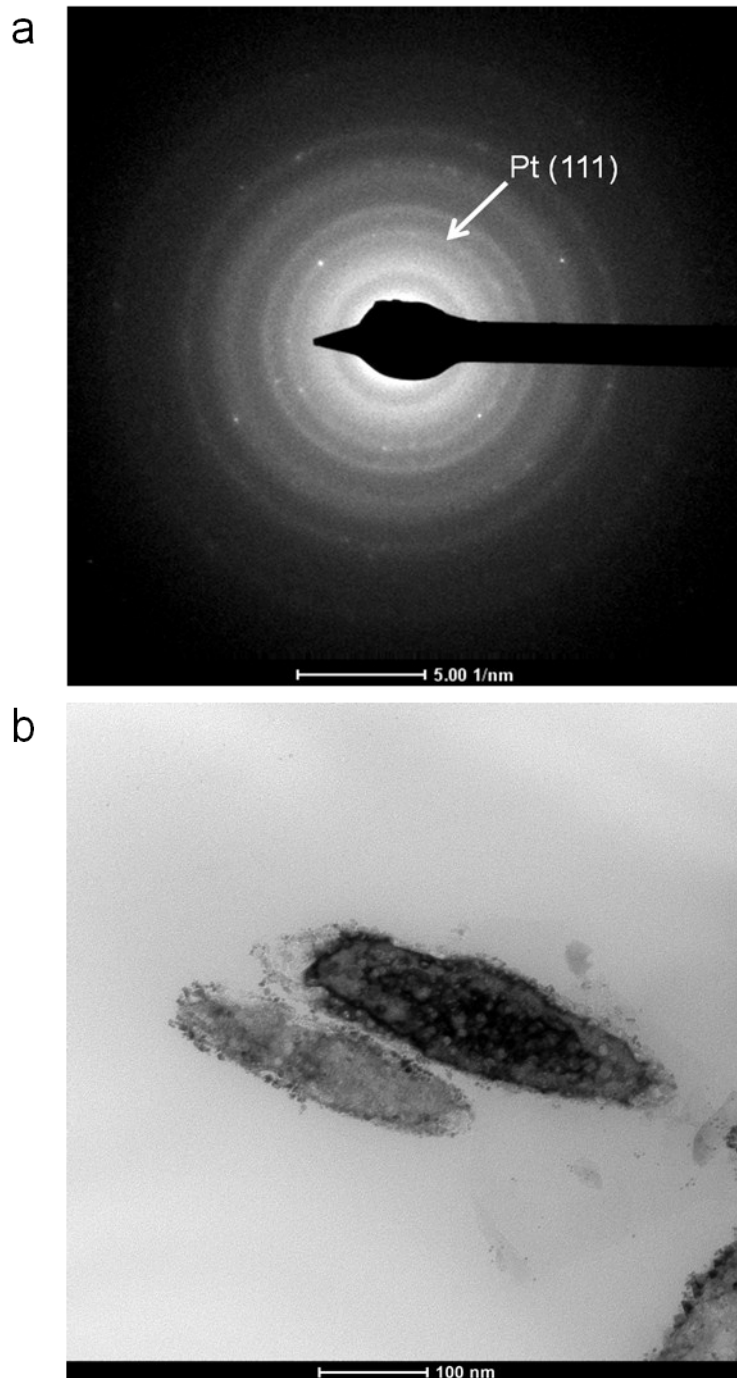

Fig. S2 (a) SAED pattern obtained from calcined  $\alpha\text{-Fe}_2\text{O}_3@\text{Pt}/\text{Ti}(\text{OH})_4$  at 500 °C; (b) the TEM image of  $\alpha\text{-Fe}_2\text{O}_3@\text{Pt}/\text{Ti}(\text{OH})_4$  treated with dilute HCl solution (10 Wt%) at room temperature.

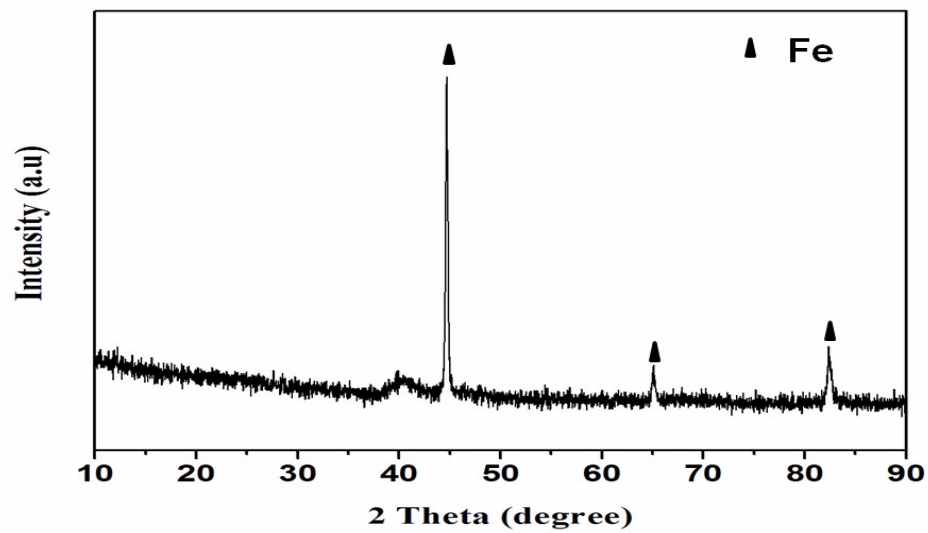

Fig. S3 XRD patterns of  $\text{Fe}@\text{Pt}/\text{Ti}(\text{OH})_4$ .

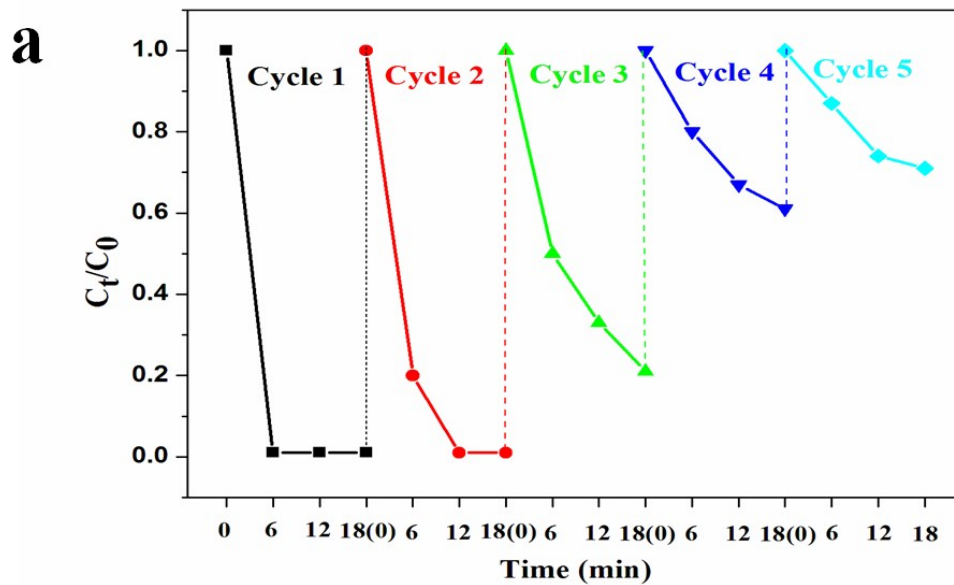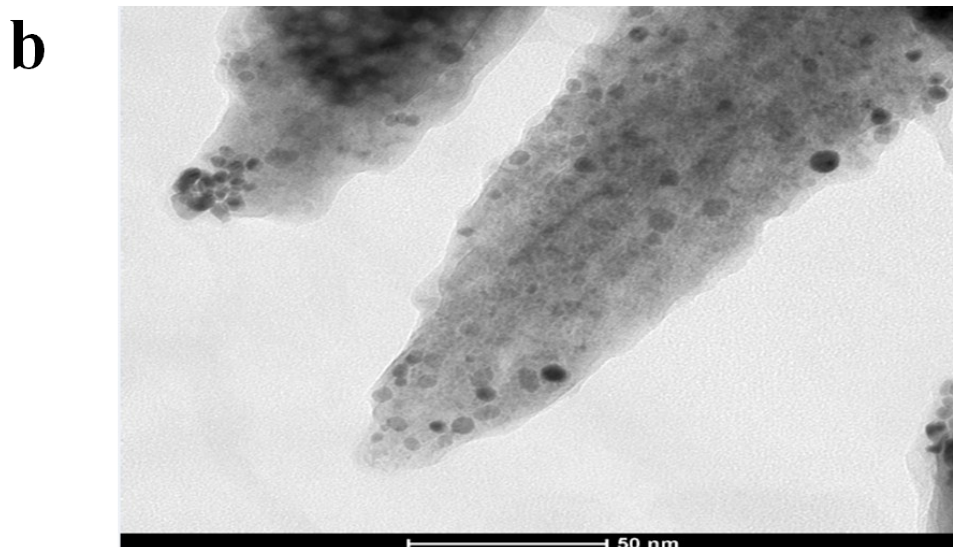

Fig. S4 (a)  $C_t/C_0$  as a function of the reaction time in five successive reduction using TN500 catalyst, (b) TEM image of the final TN500 catalyst.

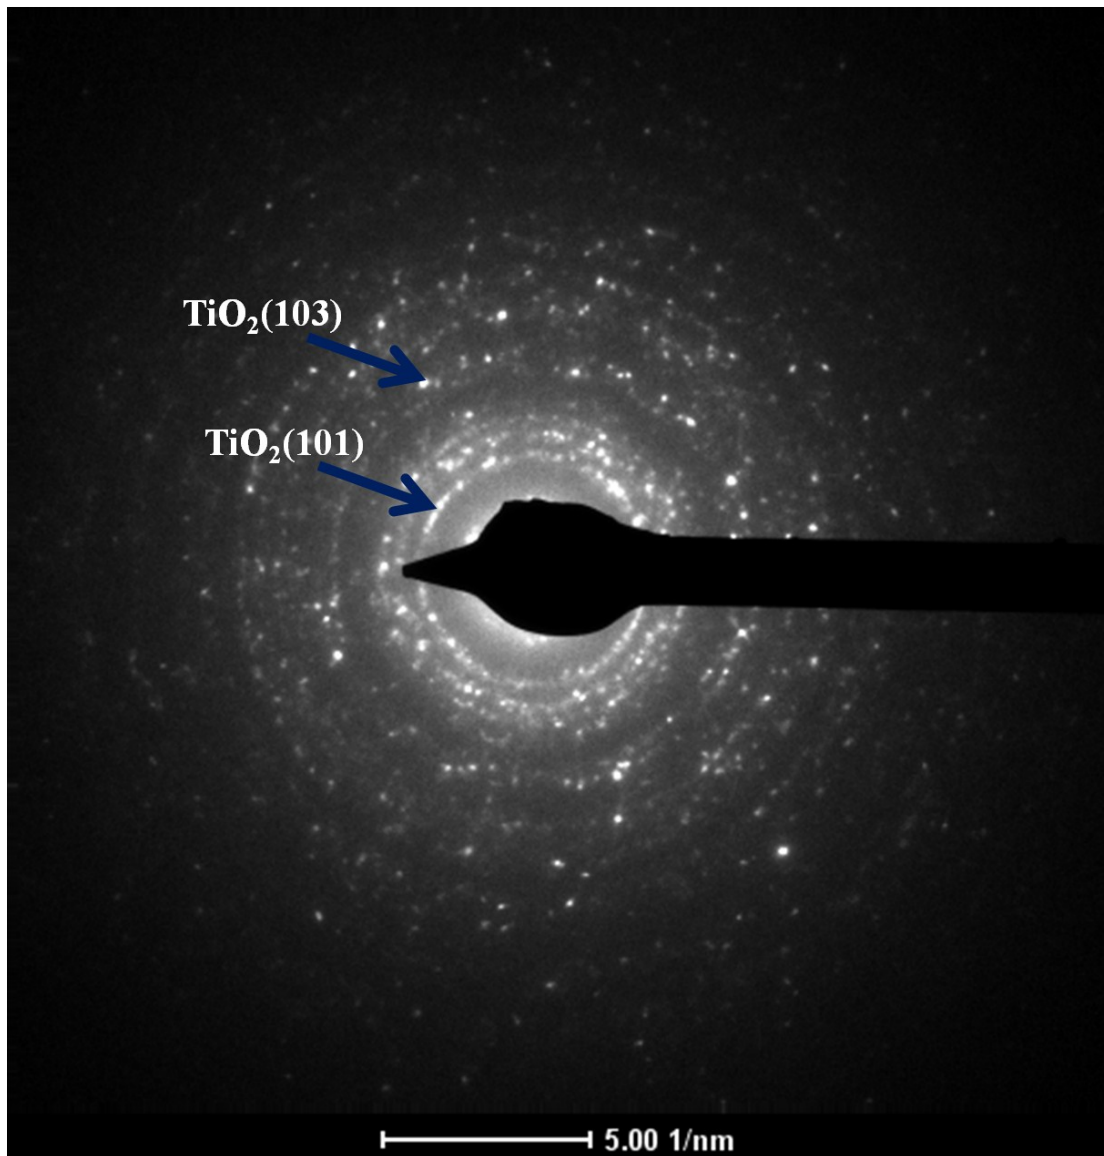

Fig. S5 SAED pattern obtained from Fe@Pt/Ti(OH)<sub>4</sub> calcined at 700 °C.

Table S1 Comparison of rate constant for the catalytic reduction of 4-NP by NaBH<sub>4</sub> using Pt-based nanocatalysts.

| Catalyst                                                | Size of noble metal NPs (nm) | Initial concentration of 4-NP (mM) | Amount of noble NPs (nmol) | k <sub>app</sub> per noble NPs content (10 <sup>-2</sup> s <sup>-1</sup> μmol <sup>-1</sup> ) | The multiple of k <sub>app</sub> |
|---------------------------------------------------------|------------------------------|------------------------------------|----------------------------|-----------------------------------------------------------------------------------------------|----------------------------------|
| Fe@Pt/Ti(OH) <sub>4</sub> (This work)                   | 4.15                         | 0.1                                | 56.38                      | 5.1                                                                                           | 1                                |
| ultra-small Pt NPs <sup>1</sup>                         | 2.8                          | 0.14                               | 510                        | 4.12                                                                                          | 1.24                             |
| mSiO <sub>2</sub> /Pt/TiO <sub>2</sub> /Fe <sup>2</sup> | 4.52                         | 0.1                                | 203                        | 3.6                                                                                           | 1.42                             |
| dendritic Pt NPs <sup>3</sup>                           | 31.1                         | 2                                  | 0.935                      | 80                                                                                            | 0.06                             |
| Porous AuPt particles <sup>4</sup>                      | -                            | 0.24                               | 2564                       | 2.145                                                                                         | 2.38                             |
| PtCo/NaY <sup>5</sup>                                   | 14                           | 7.2                                | 579.5                      | 1.722                                                                                         | 2.96                             |

## References

1. T. Maji, S. Banerjee, M. Biswas and T. K. Mandal, *RSC Adv.*, 2014, **4**, 51745-51753.
2. C. Zhang, Y. Zhou, Y. Zhang, Q. Wang and Y. Xu, *RSC Adv.*, 2015, **5**, 12472-12479.
3. J. Wang, X. B. Zhang, Z. L. Wang, L. M. Wang, W. Xing and X. Liu, *Nanoscale*, 2012, **4**, 1549-1552.
4. A. J. Ma, J. Xu, X. H. Zhang, B. Zhang, D. Y. Wang and H. L. Xu, *Sci Rep-Uk*, 2014, **4**.
5. Z. M. El-Bahy, *Appl Catal a-Gen*, 2013, **468**, 175-183.
